# Supplementary material for: Migfilin supports hemostasis and thrombosis through regulating platelet aIIbβ3 outside-in signaling
Source: PubMed Central journal article supplement — Haematologica. 2019 Dec 26;105(11):2608–18. doi: 10.3324/haematol.2019.232488 (PMC7604612; doi:10.3324/haematol.2019.232488), 2019-12-26
Supplement: 2019_232488-Disclosures_Contributions.pdf [file 2019_232488-Disclosures_Contributions.pdf]

Haematologica  
HAEMATOL/2019/232488  
Version 3

Migfilin supports hemostasis and thrombosis through regulating platelet  $\alpha$ IIb $\beta$ 3 outside-in signaling.

Yangfan Zhou, Mengjiao Hu, Xiaoyan Chen, Shuai Wang, Jingke Li,  
Lina Sa, Li Li, Jiaqi Huang, Hongqiang Cheng, and Hu Hu

Disclosures: none

Contributions: Contributions: Y.Z. performed experiments, analyzed data, wrote and revised the manuscript; M.H., X.C., and S.W. performed experiments, analyzed data, and revised the manuscript; J.L., L.S., L.L. and J.H. performed experiments and analyzed data; H.C. and H.H. designed the research, wrote and revised the manuscript.
